# Supplementary material for: Dispersion of arc-discharged single-walled carbon nanotubes using the natural α-amino acid derivative N-dodecanoyl leucinate
Source: Royal Society of Chemistry journal article supplement (doi:10.1039/d0ra02862b), 2020-01-01
Supplement: d0ra02862b1.pdf [file d0ra02862b1.pdf]

## Dispersion of arc-discharged single-walled carbon nanotubes using the natural $\alpha$ -amino acid derivate *N*-dodecanoyl leucinate

Heng Zhao,<sup>a</sup> Lihua Guo<sup>\*b</sup> and Yongfu Lian<sup>\*a</sup>

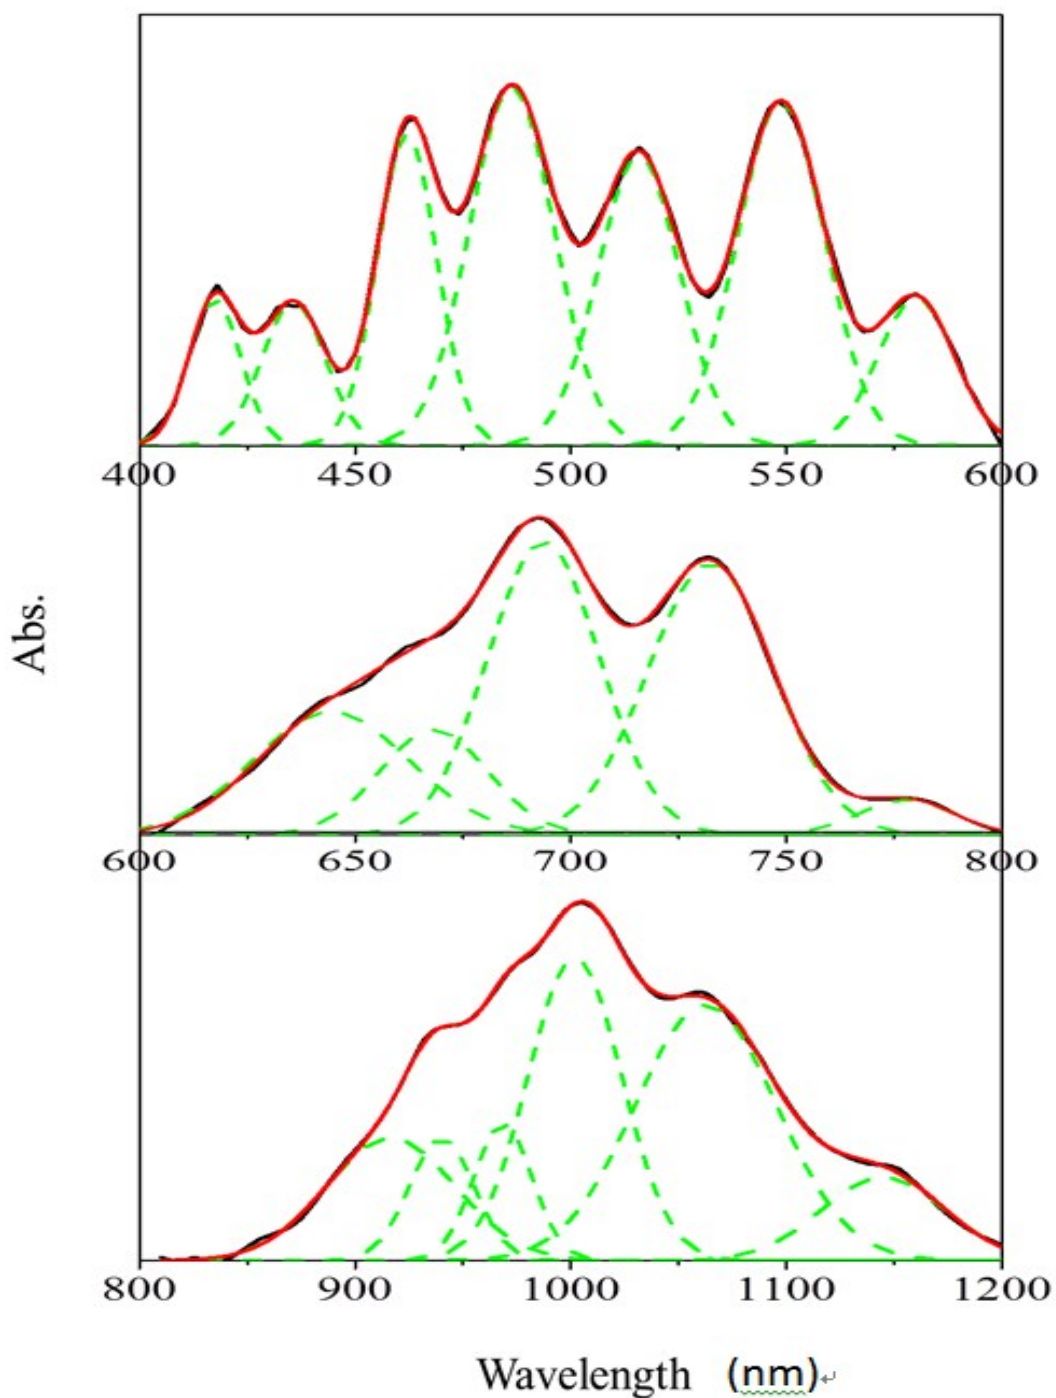

Figure S1 Gaussian fitting of the optical absorption spectrum of the sodium *N*-dodecanoyl leucinate dispersed SWNTs.

Table S1 Assignment of the optical absorption features to the interband transitions and chiral indices of SWNTs.

| Absorption peaks (nm) | Interband transitions | Calculated diameters (nm) | Chiral indices (n, m) |
|-----------------------|-----------------------|---------------------------|-----------------------|
| 416.3                 | S <sub>44</sub>       | 1.406                     | (16,3)                |
| 436.2                 | S <sub>33</sub>       | 1.175                     | (11,6)                |
| 461.8                 | 2S <sub>33</sub>      | 1.244                     | (14,3)                |
| 486.3                 | 3S <sub>33</sub>      | 1.311                     | (10,9)                |
| 518.5                 | S <sub>33</sub>       | 1.397                     | (14,6)                |
| 548.0                 | S <sub>33</sub>       | 1.477                     | (14,7)                |
| 585.0                 | S <sub>33</sub>       | 1.575                     | (12,11)               |
| 732.9                 | M <sub>11</sub>       | 1.482                     | (15,6)                |
| 777.1                 | M <sub>11</sub>       | 1.571                     | (13,10)               |
| 673.2                 | M <sub>11</sub>       | 1.361                     | (10,10)               |
| 641.8                 | M <sub>11</sub>       | 1.298                     | (11,8)                |
| 695.2                 | M <sub>11</sub>       | 1.404                     | (13,7)                |
| 942.8                 | S <sub>22</sub>       | 1.270                     | (13,5)                |
| 1010.4                | S <sub>22</sub>       | 1.361                     | (16,2)                |
| 1054.9                | S <sub>22</sub>       | 1.421                     | (14,6)                |
| 905.3                 | S <sub>22</sub>       | 1.220                     | (14,3)                |
| 978.1                 | S <sub>22</sub>       | 1.318                     | (10,9)                |

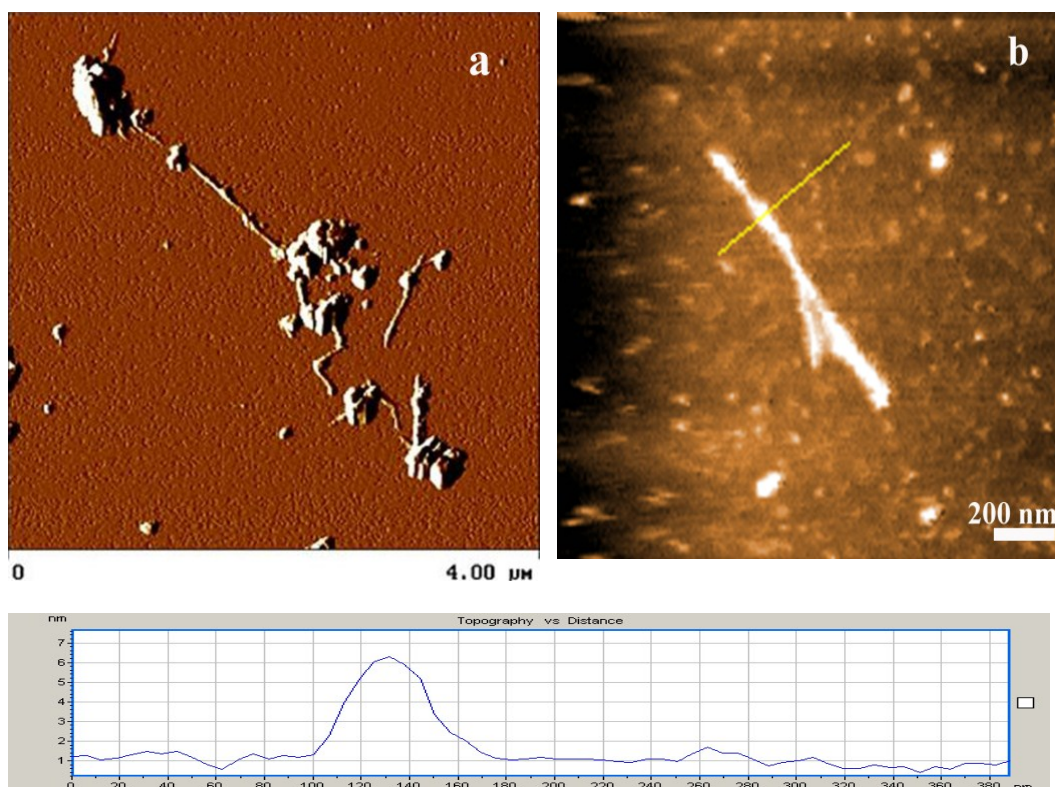

Figure S2. AFM of primary purified single-walled carbon nanotubes.

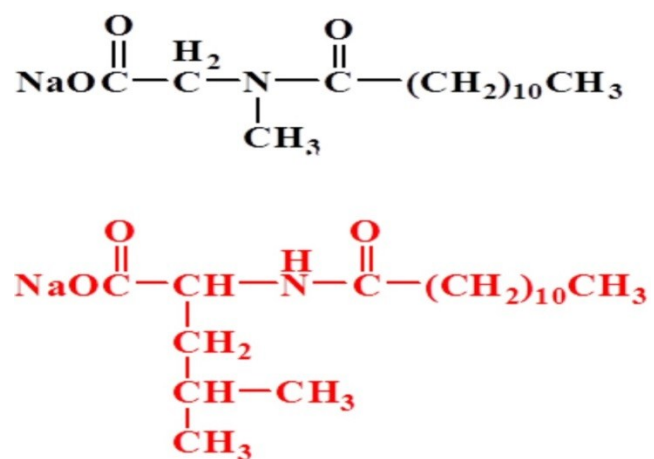

Figure S3 Molecular structures of sodium *N*-cocoyl sarcosinate (black) and sodium *N*-dodecanoyl leucinate (red).

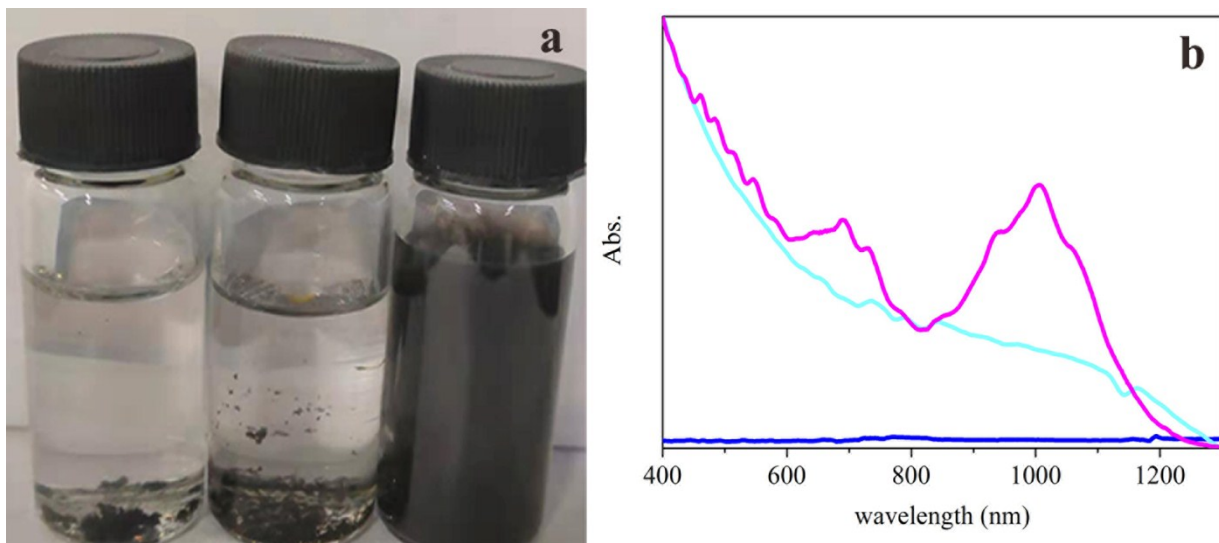

Figure S4 The photos (from left to right) (a) and optical absorption spectra (from bottom to top) (b) of the leucine, *N*-dodecanoyl leucine and sodium *N*-dodecanoyl leucinate dispersed SWNTs, respectively.

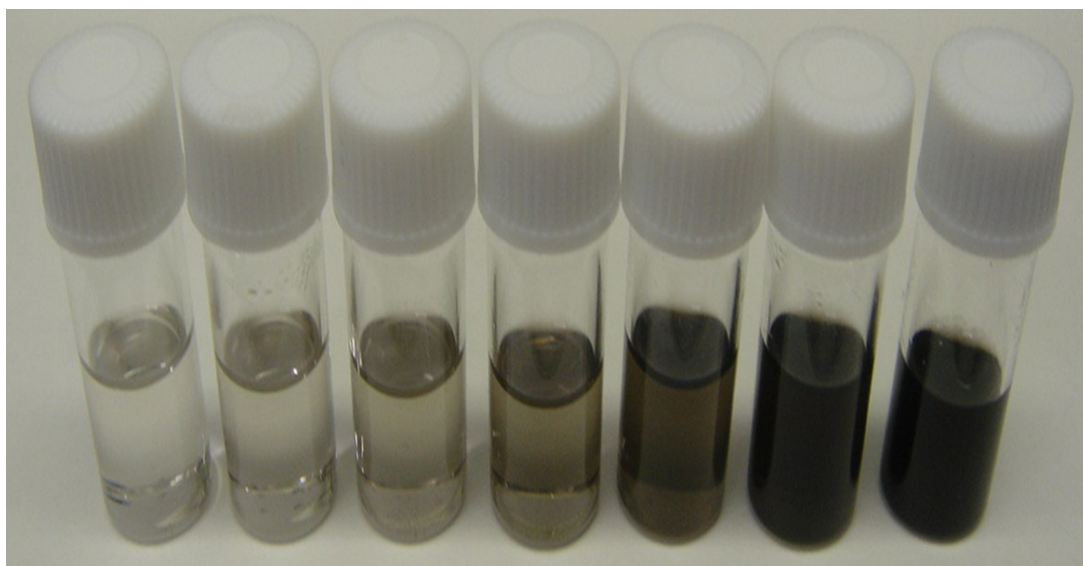

Figure S5 The photos (from left to right) of sodium *N*-dodecanoyl leucinate dispersed SWNTs with concentrations of 1.2, 2.3, 4.7, 9.4, 18.8 and 37.5  $\mu\text{g/ml}$ , respectively.

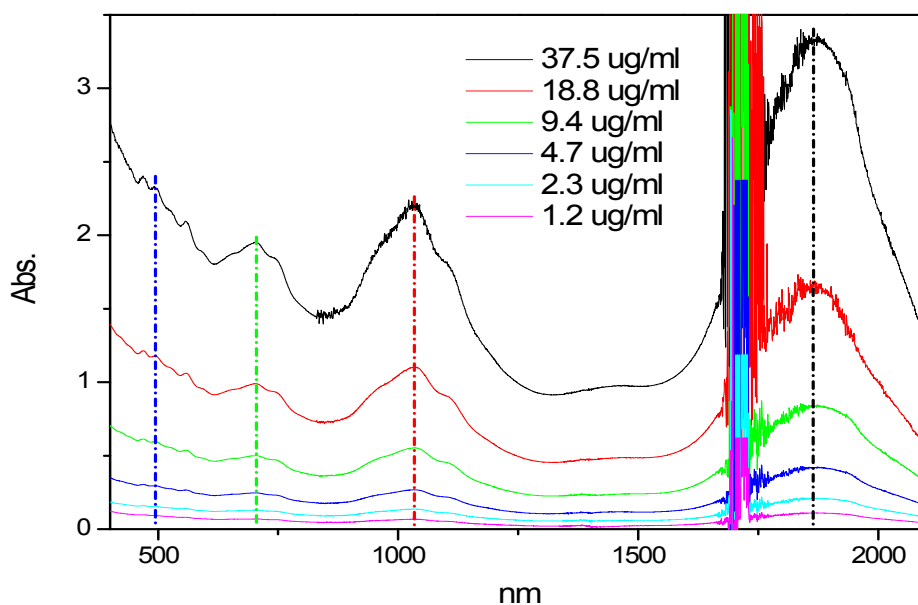

Fig S6 Vis-NIR spectra of the dispersed SWNTs with varying concentrations of sodium *N*-dodecanoyl leucinate

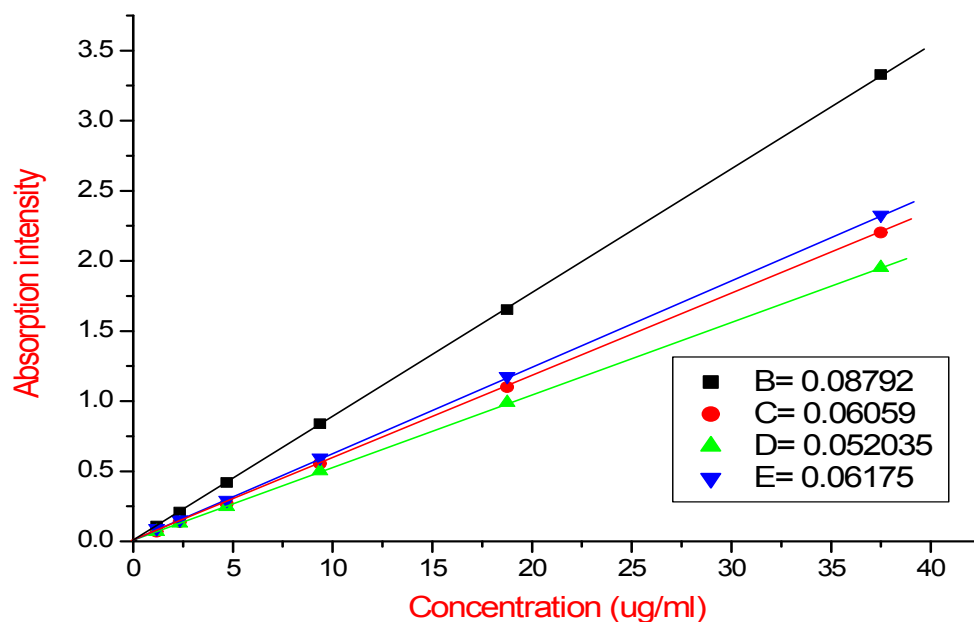

Fig S7 The absorbance dependence on the concentration of the sodium *N*-dodecanoyl leucinate dispersed SWNTs at  $S_{33}$  (blue)  $S_{22}$  (red)  $M_{11}$  (green) and  $S_{11}$  absorption bands, respectively.

Table S2 The extinction coefficients of the sodium *N*-dodecanoyl leucinate dispersed SWNTs at  $S_{33}$ ,  $S_{22}$ ,  $M_{11}$  and  $S_{33}$  absorption bands, respectively.

|                                               | $S_{33}$ (493 nm) | $M_{11}$ (700 nm) | $S_{22}$ (1037 nm) | $S_{11}$ (1850 nm) |
|-----------------------------------------------|-------------------|-------------------|--------------------|--------------------|
| Slope                                         | 0.06175           | 0.05204           | 0.06059            | 0.08792            |
| $\epsilon(\text{mg/mL})^{-1} \text{ cm}^{-1}$ | 61.75             | 52.04             | 60.59              | 87.92              |
